# Supplementary material for: Chitosan coated copper-oxide nano particles: a novel electro-catalyst for CO2reduction
Source: Royal Society of Chemistry journal article supplement (doi:10.1039/c4ra12696c), 2014-01-01
Supplement: c4ra12696c1.pdf [file c4ra12696c1.pdf]

Electronic Supplementary Material (ESI) for RSC Advances.  
This journal is © The Royal Society of Chemistry 2014

## Chitosan coated copper-oxides nano particles: A novel electro-catalyst for CO<sub>2</sub> reduction

S. Basumallick <sup>a,b,c</sup>, S.Santra<sup>b,c</sup>

Received (in XXX, XXX) Xth XXXXXXXXXX 20XX, Accepted Xth XXXXXXXXXX 20XX  
DOI: 10.1039/b000000x

### Supplementary Information

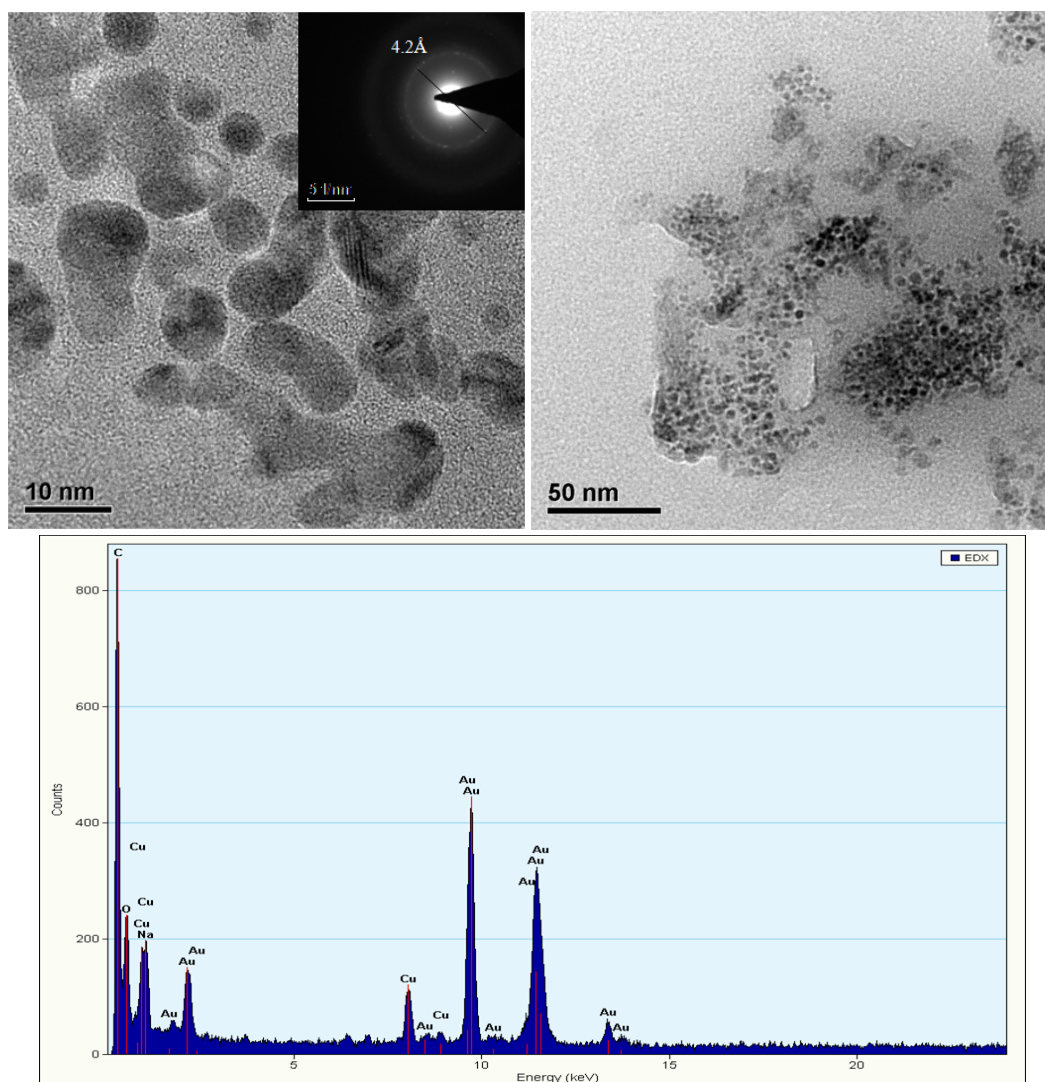

Fig. S1 HRTEM of Chitosan coated Cu<sub>2</sub>O in high magnification (top left) and low magnification (top right) with SAED pattern (top left; inset) and EDX pattern (bottom).

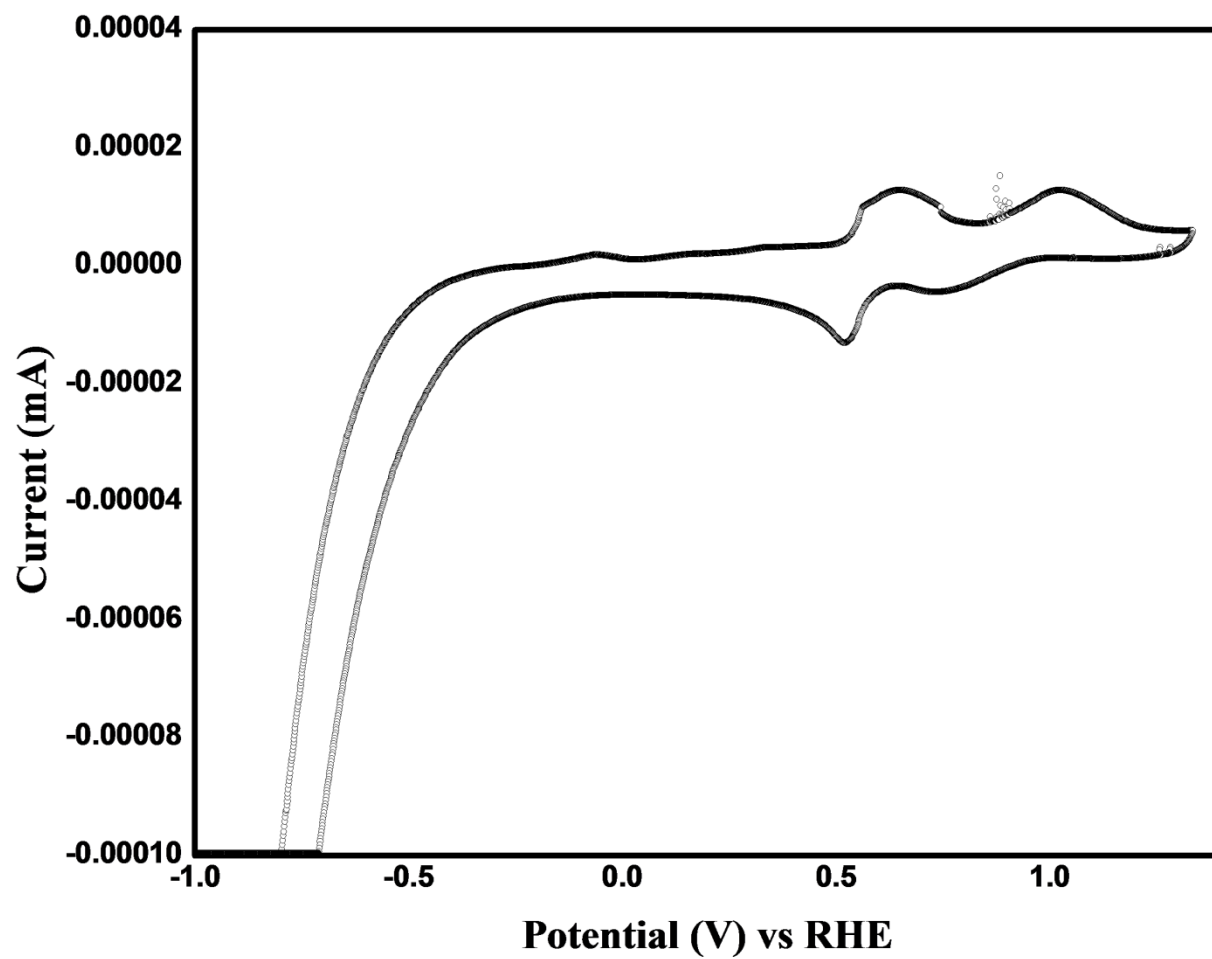

Fig. S2 CV for control  $\text{Cu}_x\text{O}$  at scan rate of  $50 \text{ mVs}^{-1}$ .
